# Supplementary material for: Increased Urine Excretion of Neutrophil Granule Cargo in Active Proliferative Lupus Nephritis
Source: PubMed Central journal article supplement (PMC11371349; doi:10.34067/kid.0000000000000491), 2024-07-02
Supplement: kidney360-5-1154-s001.pdf [file kidney360-5-1154-s001.pdf]

## Supplemental Tables 1-4

Supplemental Table 1. Clinical Characteristics of Patient Cohort used for Array Assay

| n=10 | Age (years) | Sex (F, M) | Self-identified Race (Black, White, Asian) | UPCR (mg/g) | eGFR (mL/min/1.73 m <sup>2</sup> ) | Serum Creatinine (mg/dL) | dsDNA antibody titer (IU/mL) | C3 (mg/dL) | C4 (mg/dL) | LN Class | Number included | Medication            | Number of Patients |
|------|-------------|------------|--------------------------------------------|-------------|------------------------------------|--------------------------|------------------------------|------------|------------|----------|-----------------|-----------------------|--------------------|
|      | average     | min        | max                                        | 7, 2, 1     | 3349.71                            | 76.90                    | 1.18                         | 1154       | 63.4       |          |                 |                       |                    |
|      | 18          | 10, 0      |                                            | 734.94      | 28.00                              | 0.64                     | 40                           | 19         | 3          | III      | 1               | Mycophenolate mofetil | 8                  |
|      | 44          |            |                                            | 6731.43     | 130.00                             | 2.38                     | 4079                         | 112        | 17         | IV       | 5               | Prednisone            | 6                  |
|      |             |            |                                            |             |                                    |                          |                              |            |            | III/IV   | 5               | Cyclophosphamide      | 1                  |
|      |             |            |                                            |             |                                    |                          |                              |            |            | IV/V     | 5               | Tacrolimus            | 1                  |
|      |             |            |                                            |             |                                    |                          |                              |            |            |          |                 | Belimumab             | 2                  |

Supplemental Table 2. Clinical Characteristics of Patient Cohort used for ELISA Validation

| a. Proliferative LN Patients |             |              |                                            |             |                                    |                          |                              |            |            |          |                    |
|------------------------------|-------------|--------------|--------------------------------------------|-------------|------------------------------------|--------------------------|------------------------------|------------|------------|----------|--------------------|
|                              | Age (years) | Sex (F/M, %) | Self-Identified Race (Black, White, Asian) | UPCR (mg/g) | eGFR (mL/min/1.73 m <sup>2</sup> ) | Serum Creatinine (mg/dL) | dsDNA antibody titer (IU/mL) | C3 (mg/dL) | C4 (mg/dL) | LN Class | Number of Patients |
| α-JAG                        | n=16        |              |                                            |             |                                    |                          |                              |            |            |          |                    |
|                              | average     | 36.33        | 16, 0                                      | 14, 2, 0    | 1889.80                            | 62.00                    | 1.63                         | 89.40      | 21.20      | III      | 1                  |
|                              | min         | 22.20        |                                            |             | 905.00                             | 13.00                    | 0.71                         | 60.00      | 10.00      | IV       | 5                  |
|                              | max         | 54.86        |                                            |             | 3506.73                            | 120.00                   | 4.27                         | 136.00     | 38.00      | III/V    | 5                  |
| MMP-9 Lactoferrin            | n=21        |              |                                            |             |                                    |                          |                              |            |            |          |                    |
|                              | average     | 32.45        | 21, 0                                      | 18, 2, 1    | 2583.51                            | 69.81                    | 1.45                         | 64.85      | 16.19      | III      | 3                  |
|                              | min         | 20.72        |                                            |             | 905.00                             | 13.00                    | 0.64                         | 1.00       | 3.00       | IV       | 7                  |
|                              | max         | 48.95        |                                            |             | 6731.43                            | 130.00                   | 4.27                         | 4079.00    | 38.00      | III/V    | 5                  |
| Antrocinin MPO               | n=18        |              |                                            |             |                                    |                          |                              |            |            |          |                    |
|                              | average     | 33.14        | 17, 1                                      | 15, 2, 1    | 2340.01                            | 77.44                    | 1.15                         | 64.88      | 16.94      | III      | 2                  |
|                              | min         | 20.72        |                                            |             | 734.94                             | 28.00                    | 0.64                         | 4.00       | 3.00       | IV       | 5                  |
|                              | max         | 48.55        |                                            |             | 6731.43                            | 130.00                   | 2.38                         | 4079.00    | 47.00      | III/V    | 6                  |
| Neutrophil Elastase          | n= 21       |              |                                            |             |                                    |                          |                              |            |            |          |                    |
|                              | average     | 34.35        | 20, 1                                      | 17, 3, 1    | 2251.67                            | 81.40                    | 1.14                         | 548.30     | 81.53      | III      | 3                  |
|                              | min         | 20.72        |                                            |             | 625.00                             | 28.00                    | 0.62                         | 6.00       | 3.00       | IV       | 6                  |
|                              | max         | 64.94        |                                            |             | 6731.43                            | 145.00                   | 2.38                         | 4079.00    | 47.00      | III/V    | 6                  |
| b. Nephrotic Controls        |             |              |                                            |             |                                    |                          |                              |            |            |          |                    |
| Class V LN                   | n=6         |              |                                            |             |                                    |                          |                              |            |            |          |                    |
|                              | average     | 35.77        | 5, 1                                       | 5, 1, 0     | 6199.50                            | 89.75                    | 1.05                         | 231.67     | 122.25     | III      | 3                  |
|                              | min         | 26.41        |                                            |             | 1563.00                            | 54.00                    | 0.54                         | 1.00       | 101.00     | III/V    | 6                  |
|                              | max         | 54.56        |                                            |             | 13476.00                           | 129.00                   | 1.66                         | 684.00     | 146.00     | IV/V     | 6                  |
| MCD                          | n=3         |              |                                            |             |                                    |                          |                              |            |            |          |                    |
|                              | average     | 48.60        | 1, 2                                       | 1, 2, 0     | 6887.33                            | 96.67                    | 0.89                         |            |            |          |                    |
|                              | min         | 39.33        |                                            |             | 5860.00                            | 65.00                    | 0.61                         |            |            |          |                    |
|                              | max         | 54.68        |                                            |             | 8899.00                            | 117.00                   | 1.32                         |            |            |          |                    |
| MGN                          | n=6         |              |                                            |             |                                    |                          |                              |            |            |          |                    |
|                              | average     | 52.85        | 3, 3                                       | 0, 5, 1     | 10478.67                           | 71.50                    | 1.36                         |            |            |          |                    |
|                              | min         | 18.56        |                                            |             | 4769.00                            | 26.00                    | 0.43                         |            |            |          |                    |
|                              | max         | 71.95        |                                            |             | 14604.00                           | 124.00                   | 3.38                         |            |            |          |                    |

Supplemental Table 3. Clinical Characteristics of Patients Comparing Active LN to Remission

|                    | Age (years) | Sex (F/M, M) | Self-identified Race (Black, White, Asian) | UPCR (mg/g) | eGFR (mL/min/1.73 m <sup>2</sup> ) | Serum Creatinine (mg/dL) | dsDNA antibody titer (IU/mL) | C3 (mg/dL) | C4 (mg/dL) | LN Class | Number included | Medication            | Number of Patients |
|--------------------|-------------|--------------|--------------------------------------------|-------------|------------------------------------|--------------------------|------------------------------|------------|------------|----------|-----------------|-----------------------|--------------------|
| n=15 (active LN)   |             |              |                                            |             |                                    |                          |                              |            |            |          |                 |                       |                    |
| average            | 35.86       | 14, 1        | 13, 2, 0                                   | 1360.00     | 82.29                              | 1.10                     | 99.20                        | 105.38     | 24.08      | III      | 3               | Mycophenolate mofetil | 13                 |
| min                | 23.58       |              |                                            | 625.00      | 36.00                              | 0.62                     | 4                            | 53         | 6          | IV       | 3               | Prednisone            | 12                 |
| max                | 64.94       |              |                                            | 2950.00     | 145.00                             | 1.91                     | 403                          | 201        | 47         | III/IV   | 7               | Hydroxychloroquine    | 11                 |
|                    |             |              |                                            |             |                                    |                          |                              |            |            | IV/V     | 2               | Belimumab             | 4                  |
|                    |             |              |                                            |             |                                    |                          |                              |            |            |          |                 | Ecilizumab            | 1                  |
|                    |             |              |                                            |             |                                    |                          |                              |            |            |          |                 | Voclosporin           | 1                  |
|                    |             |              |                                            |             |                                    |                          |                              |            |            |          |                 | Ravulizumab           | 0                  |
|                    |             |              |                                            |             |                                    |                          |                              |            |            |          |                 | Rituxumab             | 0                  |
| n=15 (inactive LN) |             |              |                                            |             |                                    |                          |                              |            |            |          |                 |                       |                    |
| average            | 36.61       | 14, 1        | 13, 2, 0                                   | 309.93      | 68.36                              | 1.25                     | 90.85                        | 111.25     | 23.67      | III      | 3               | Mycophenolate mofetil | 13                 |
| min                | 22.62       |              |                                            | 122.00      | 36.00                              | 0.67                     | 3                            | 68         | 9          | IV       | 3               | Prednisone            | 10                 |
| max                | 66.49       |              |                                            | 492.00      | 141.00                             | 1.88                     | 706                          | 168        | 41         | III/IV   | 7               | Hydroxychloroquine    | 12                 |
|                    |             |              |                                            |             |                                    |                          |                              |            |            | IV/V     | 2               | Belimumab             | 2                  |
|                    |             |              |                                            |             |                                    |                          |                              |            |            |          |                 | Ecilizumab            | 0                  |
|                    |             |              |                                            |             |                                    |                          |                              |            |            |          |                 | Voclosporin           | 1                  |
|                    |             |              |                                            |             |                                    |                          |                              |            |            |          |                 | Ravulizumab           | 1                  |

Supplemental Table 4. Clinical Characteristics of Patient Cohort used for Degranulation Assay

|         | Age (years) | Sex (F/M, M) | Self-identified Race (Black, White, Asian) | UPCR (mg/g) | eGFR (mL/min/1.73 m <sup>2</sup> ) | Serum Creatinine (mg/dL) | dsDNA antibody titer (IU/mL) | C3 (mg/dL) | C4 (mg/dL) | LN Class | Number included | Medication            | Number of Patients |
|---------|-------------|--------------|--------------------------------------------|-------------|------------------------------------|--------------------------|------------------------------|------------|------------|----------|-----------------|-----------------------|--------------------|
| n=19    |             |              |                                            |             |                                    |                          |                              |            |            |          |                 |                       |                    |
| average | 38          | 18, 1        | 16, 3, 0                                   | 1120.00     | 62.85                              | 1.40                     | 178                          | 107        | 21         | III      | 5               | Mycophenolate mofetil | 17                 |
| min     | 22          |              |                                            | 89.00       | 19.00                              | 0.70                     | 1                            | 54         | 7          | IV       | 4               | Prednisone            | 15                 |
| max     | 68          |              |                                            | 5154.00     | 119.00                             | 2.40                     | 2815                         | 201        | 44         | III/IV   | 5               | Tacrolimus            | 1                  |
|         |             |              |                                            |             |                                    |                          |                              |            |            | IV/V     | 2               | Belimumab             | 2                  |
|         |             |              |                                            |             |                                    |                          |                              |            |            | V        | 3               |                       |                    |
