# Supplementary material for: Increased Urine Excretion of Neutrophil Granule Cargo in Active Proliferative Lupus Nephritis
Source: PubMed Central journal article supplement (PMC11371349; doi:10.34067/kid.0000000000000491), 2024-07-02
Supplement: kidney360-5-1154-s002.pdf [file kidney360-5-1154-s002.pdf]

## ASN Journal Disclosure Form

As per ASN journal policy, I have disclosed any financial relationships or commitments I have held in the past 36 months as included below. I have listed my Current Employer below to indicate there is a relationship requiring disclosure. If no relationship exists, my Current Employer is not listed.

M. Barati reports the following:

Employer: University of Louisville

I understand that the information above will be published within the journal article, if accepted, and that failure to comply and/or to accurately and completely report the potential financial conflicts of interest could lead to the following: 1) Prior to publication, article rejection, or 2) Post-publication, sanctions ranging from, but not limited to, issuing a correction, reporting the inaccurate information to the authors' institution, banning authors from submitting work to ASN journals for varying lengths of time, and/or retraction of the published work.

Name: Michelle T. Barati

Manuscript ID: K360-2024-000030R1

Manuscript Title: Increased Urine Excretion of Neutrophil Granule Cargo in Active Proliferative Lupus Nephritis

Date of Completion: June 1, 2024

Disclosure Updated Date: May 20, 2024

## ASN Journal Disclosure Form

As per ASN journal policy, I have disclosed any financial relationships or commitments I have held in the past 36 months as included below. I have listed my Current Employer below to indicate there is a relationship requiring disclosure. If no relationship exists, my Current Employer is not listed.

M. Brady reports the following:

Employer: University of Louisville

I understand that the information above will be published within the journal article, if accepted, and that failure to comply and/or to accurately and completely report the potential financial conflicts of interest could lead to the following: 1) Prior to publication, article rejection, or 2) Post-publication, sanctions ranging from, but not limited to, issuing a correction, reporting the inaccurate information to the authors' institution, banning authors from submitting work to ASN journals for varying lengths of time, and/or retraction of the published work.

Name: Makayla Brady

Manuscript ID: K360-2024-000030R1

Manuscript Title: Increased Urine Excretion of Neutrophil Granule Cargo in Active Proliferative Lupus Nephritis

Date of Completion: May 31, 2024

Disclosure Updated Date: May 21, 2024

## ASN Journal Disclosure Form

As per ASN journal policy, I have disclosed any financial relationships or commitments I have held in the past 36 months as included below. I have listed my Current Employer below to indicate there is a relationship requiring disclosure. If no relationship exists, my Current Employer is not listed.

D. Caster reports the following:

Employer: University of Louisville; Consultancy: Aurinia, Cabaletta, Calliditas, Chinook (Novartis), GSK, and Travers; Ownership Interest: Individual stock holdings in Coca-Cola and Procter and Gamble; Research Funding: PI on Industry Sponsored Clinical Trials sponsored by Alexion, Chinook/Novartis, and Travers; Honoraria: Aurinia, Calliditas, Chinook/Novartis, Genentech/Roche, GSK, and Travers; Advisory or Leadership Role: Lupus Foundation of America Medical Scientific Advisory Counsel; Glomerular Diseases Editorial Board; Speakers Bureau: Aurinia, GSK, Calliditas; and Other Interests or Relationships: National Institutes of Health: NIH R01 1R01DK126777.

I understand that the information above will be published within the journal article, if accepted, and that failure to comply and/or to accurately and completely report the potential financial conflicts of interest could lead to the following: 1) Prior to publication, article rejection, or 2) Post-publication, sanctions ranging from, but not limited to, issuing a correction, reporting the inaccurate information to the authors' institution, banning authors from submitting work to ASN journals for varying lengths of time, and/or retraction of the published work.

Name: Dawn J. Caster

Manuscript ID: K360-2024-000030R1

Manuscript Title: Increased Urine Excretion of Neutrophil Granule Cargo in Active Proliferative Lupus Nephritis

Date of Completion: May 31, 2024

Disclosure Updated Date: May 31, 2024

## ASN Journal Disclosure Form

As per ASN journal policy, I have disclosed any financial relationships or commitments I have held in the past 36 months as included below. I have listed my Current Employer below to indicate there is a relationship requiring disclosure. If no relationship exists, my Current Employer is not listed.

M. Daniels reports the following:

Employer: University of Louisville

I understand that the information above will be published within the journal article, if accepted, and that failure to comply and/or to accurately and completely report the potential financial conflicts of interest could lead to the following: 1) Prior to publication, article rejection, or 2) Post-publication, sanctions ranging from, but not limited to, issuing a correction, reporting the inaccurate information to the authors' institution, banning authors from submitting work to ASN journals for varying lengths of time, and/or retraction of the published work.

Name: Michael W Daniels

Manuscript ID: K360-2024-000030R1

Manuscript Title: Increased Urine Excretion of Neutrophil Granule Cargo in Active Proliferative Lupus Nephritis

Date of Completion: June 3, 2024

Disclosure Updated Date: June 1, 2024

## ASN Journal Disclosure Form

As per ASN journal policy, I have disclosed any financial relationships or commitments I have held in the past 36 months as included below. I have listed my Current Employer below to indicate there is a relationship requiring disclosure. If no relationship exists, my Current Employer is not listed.

L. Davis-Johnson has nothing to disclose.

I understand that the information above will be published within the journal article, if accepted, and that failure to comply and/or to accurately and completely report the potential financial conflicts of interest could lead to the following: 1) Prior to publication, article rejection, or 2) Post-publication, sanctions ranging from, but not limited to, issuing a correction, reporting the inaccurate information to the authors' institution, banning authors from submitting work to ASN journals for varying lengths of time, and/or retraction of the published work.

Name: Lashaia Davis-Johnson

Manuscript ID: K360-2024-000030R1

Manuscript Title: Increased Urine Excretion of Neutrophil Granule Cargo in Active Proliferative Lupus Nephritis

Date of Completion: April 23, 2024

Disclosure Updated Date: April 23, 2024

## ASN Journal Disclosure Form

As per ASN journal policy, I have disclosed any financial relationships or commitments I have held in the past 36 months as included below. I have listed my Current Employer below to indicate there is a relationship requiring disclosure. If no relationship exists, my Current Employer is not listed.

A. Dubbaka reports the following:

Employer: University of Louisville School of Medicine

I understand that the information above will be published within the journal article, if accepted, and that failure to comply and/or to accurately and completely report the potential financial conflicts of interest could lead to the following: 1) Prior to publication, article rejection, or 2) Post-publication, sanctions ranging from, but not limited to, issuing a correction, reporting the inaccurate information to the authors' institution, banning authors from submitting work to ASN journals for varying lengths of time, and/or retraction of the published work.

Name: Anjali Dubbaka

Manuscript ID: K360-2024-000030R1

Manuscript Title: Increased Urine Excretion of Neutrophil Granule Cargo in Active Proliferative Lupus Nephritis

Date of Completion: April 23, 2024

Disclosure Updated Date: April 23, 2024

## ASN Journal Disclosure Form

As per ASN journal policy, I have disclosed any financial relationships or commitments I have held in the past 36 months as included below. I have listed my Current Employer below to indicate there is a relationship requiring disclosure. If no relationship exists, my Current Employer is not listed.

R. Lightman has nothing to disclose.

I understand that the information above will be published within the journal article, if accepted, and that failure to comply and/or to accurately and completely report the potential financial conflicts of interest could lead to the following: 1) Prior to publication, article rejection, or 2) Post-publication, sanctions ranging from, but not limited to, issuing a correction, reporting the inaccurate information to the authors' institution, banning authors from submitting work to ASN journals for varying lengths of time, and/or retraction of the published work.

Name: Rebecca Lightman

Manuscript ID: K360-2024-000030R1

Manuscript Title: Increased Urine Excretion of Neutrophil Granule Cargo in Active Proliferative Lupus Nephritis

Date of Completion: April 24, 2024

Disclosure Updated Date: April 24, 2024

## ASN Journal Disclosure Form

As per ASN journal policy, I have disclosed any financial relationships or commitments I have held in the past 36 months as included below. I have listed my Current Employer below to indicate there is a relationship requiring disclosure. If no relationship exists, my Current Employer is not listed.

C. Lynn reports the following:

Ownership Interest: Walmart INC; AT&T INC; Iron MTN INC; The Coca-Cola CO; Carnival CORP

I understand that the information above will be published within the journal article, if accepted, and that failure to comply and/or to accurately and completely report the potential financial conflicts of interest could lead to the following: 1) Prior to publication, article rejection, or 2) Post-publication, sanctions ranging from, but not limited to, issuing a correction, reporting the inaccurate information to the authors' institution, banning authors from submitting work to ASN journals for varying lengths of time, and/or retraction of the published work.

Name: Conner Wayne Lynn

Manuscript ID: K360-2024-000030R1

Manuscript Title: Increased Urine Excretion of Neutrophil Granule Cargo in Active Proliferative Lupus Nephritis

Date of Completion: May 5, 2024

Disclosure Updated Date: May 5, 2024



## ASN Journal Disclosure Form

As per ASN journal policy, I have disclosed any financial relationships or commitments I have held in the past 36 months as included below. I have listed my Current Employer below to indicate there is a relationship requiring disclosure. If no relationship exists, my Current Employer is not listed.

K. McLeish reports the following:

Employer: University of Louisville; Ownership Interest: Degranin Therapeutics, LLC; Research Funding: Degranin Therapeutics; and Advisory or Leadership Role: Degranin Therapeutics.

I understand that the information above will be published within the journal article, if accepted, and that failure to comply and/or to accurately and completely report the potential financial conflicts of interest could lead to the following: 1) Prior to publication, article rejection, or 2) Post-publication, sanctions ranging from, but not limited to, issuing a correction, reporting the inaccurate information to the authors' institution, banning authors from submitting work to ASN journals for varying lengths of time, and/or retraction of the published work.

Name: Kenneth R. McLeish

Manuscript ID: K360-2024-000030R1

Manuscript Title: Increased Urine Excretion of Neutrophil Granule Cargo in Active Proliferative Lupus Nephritis

Date of Completion: April 23, 2024

Disclosure Updated Date: April 23, 2024

## ASN Journal Disclosure Form

As per ASN journal policy, I have disclosed any financial relationships or commitments I have held in the past 36 months as included below. I have listed my Current Employer below to indicate there is a relationship requiring disclosure. If no relationship exists, my Current Employer is not listed.

D. Powell reports the following:

Employer: University of Louisville

I understand that the information above will be published within the journal article, if accepted, and that failure to comply and/or to accurately and completely report the potential financial conflicts of interest could lead to the following: 1) Prior to publication, article rejection, or 2) Post-publication, sanctions ranging from, but not limited to, issuing a correction, reporting the inaccurate information to the authors' institution, banning authors from submitting work to ASN journals for varying lengths of time, and/or retraction of the published work.

Name: David W. Powell

Manuscript ID: K360-2024-000030R1

Manuscript Title: Increased Urine Excretion of Neutrophil Granule Cargo in Active Proliferative Lupus Nephritis

Date of Completion: May 31, 2024

Disclosure Updated Date: April 24, 2024

## ASN Journal Disclosure Form

As per ASN journal policy, I have disclosed any financial relationships or commitments I have held in the past 36 months as included below. I have listed my Current Employer below to indicate there is a relationship requiring disclosure. If no relationship exists, my Current Employer is not listed.

M. Rane has nothing to disclose.

I understand that the information above will be published within the journal article, if accepted, and that failure to comply and/or to accurately and completely report the potential financial conflicts of interest could lead to the following: 1) Prior to publication, article rejection, or 2) Post-publication, sanctions ranging from, but not limited to, issuing a correction, reporting the inaccurate information to the authors' institution, banning authors from submitting work to ASN journals for varying lengths of time, and/or retraction of the published work.

Name: Madhavi J. Rane

Manuscript ID: K360-2024-000030R1

Manuscript Title: Increased Urine Excretion of Neutrophil Granule Cargo in Active Proliferative Lupus Nephritis

Date of Completion: April 24, 2024

Disclosure Updated Date: April 24, 2024

## ASN Journal Disclosure Form

As per ASN journal policy, I have disclosed any financial relationships or commitments I have held in the past 36 months as included below. I have listed my Current Employer below to indicate there is a relationship requiring disclosure. If no relationship exists, my Current Employer is not listed.

N. Shoctor reports the following:  
Employer: University of Louisville

I understand that the information above will be published within the journal article, if accepted, and that failure to comply and/or to accurately and completely report the potential financial conflicts of interest could lead to the following: 1) Prior to publication, article rejection, or 2) Post-publication, sanctions ranging from, but not limited to, issuing a correction, reporting the inaccurate information to the authors' institution, banning authors from submitting work to ASN journals for varying lengths of time, and/or retraction of the published work.

Name: Nicholas A. Shoctor

Manuscript ID: K360-2024-000030R1

Manuscript Title: Increased Urine Excretion of Neutrophil Granule Cargo in Active Proliferative Lupus Nephritis

Date of Completion: April 23, 2024

Disclosure Updated Date: May 19, 2023

## ASN Journal Disclosure Form

As per ASN journal policy, I have disclosed any financial relationships or commitments I have held in the past 36 months as included below. I have listed my Current Employer below to indicate there is a relationship requiring disclosure. If no relationship exists, my Current Employer is not listed.

S. Tandon has nothing to disclose.

I understand that the information above will be published within the journal article, if accepted, and that failure to comply and/or to accurately and completely report the potential financial conflicts of interest could lead to the following: 1) Prior to publication, article rejection, or 2) Post-publication, sanctions ranging from, but not limited to, issuing a correction, reporting the inaccurate information to the authors' institution, banning authors from submitting work to ASN journals for varying lengths of time, and/or retraction of the published work.

Name: Shweta Tandon

Manuscript ID: K360-2024-000030R1

Manuscript Title: Increased Urine Excretion of Neutrophil Granule Cargo in Active Proliferative Lupus Nephritis

Date of Completion: April 23, 2024

Disclosure Updated Date: May 19, 2023
